# Supplementary material for: A Machine-learning Based Marine Planetary Boundary Layer (MPBL) Moisture Profile Retrieval Product from GNSS-RO Deep Refraction Signals
Source: Copernicus journal article supplement (doi:10.5194/egusphere-2024-973), 2024-06-20
Supplement: Supplementary file [file egusphere-2024-973-AC1-supplement.pdf]

Reviewer #1:

Response summary:

We thank the two reviewers gratefully for their helpful and constructive suggestions. Please see our responses in **blue letters** below every comment, and **red letters** highlight the changes made in the revised manuscript. Following the reviewers' suggestions, we had made some major updates in the revised manuscript. In particular:

- (1) we didn't perform the SNR retrieval for Metop-A and Metop-B in the original submission after observing slightly different non-linear relationships (Fig. A1 and A2) compared to COSMIC-1 (Fig. 2). In the revised manuscript, 2 additional ML models are trained for Metop-A and Metop-B, respectively, and are used for generating predictions (updated Table 1) to enhance the robustness of subsequent climatology and diurnal variation studies. Note that adding in Metop-A and Metop-B retrievals only add 14 additional samples to the collocated SNR-ML retrieval – radiosonde/dropsonde data samples during the MAGIC campaign.
- (2) Meanwhile, please accept our apology if there's any confusion in the wording in the original submission. The key purpose of this work is to **prove that SNR can be used to generate profile-by-profile MABL (marine atmosphere boundary layer) specific humidity retrievals, and retrievals generated by the SNR-ML method have comparable or better quality to the operational wetPrf/wetPf2 products and ERA5 reanalysis in different weather regimes globally with 20 – 80% more successful retrievals than wetPf2 products in the lowest MABL**. Although producing a harmonized multi-year program-of-record (PoR) using the current algorithm is our ultimate goal, it is beyond the scope of this current work and we cannot do it in this paper with the limited funding and time.
- (3) We added a new Fig. 3 (see also below) to demonstrate the signal coherence at profile-by-profile level so to prove the retrievability using SNR. We can also observe the non-linear response is mission-dependent, which justifies why we need to build 3 individual ML models for each mission series.
- (4) We added Section 2.3 to recap the underlying physical mechanisms discussed in Wu et al. (2022) and Fig. 3 to justify the reason of using ML instead of physical models for realizing the operational retrieval with the SNR measurements.
- (5) We added a new Fig. 5 to illustrate the model internal architecture and deleted terminologies in the text that might be just jargons to readers.
- (6) We redraw Fig. 2, Fig. 4, Fig. 9, Fig. A1 and A2 to improve the readability.
- (7) We fixed a code bug in plotting Fig. 11 (previous Fig. 9). We also found a bug that the total number of collocated wetPrf/wetPf2 product is pressure level dependent. Therefore, we added a new Table 3 to reflect the correct collocated sample sizes at

each pressure level for each campaign. The entire Section 3.3 is largely rewritten to reflect the changes of major findings.

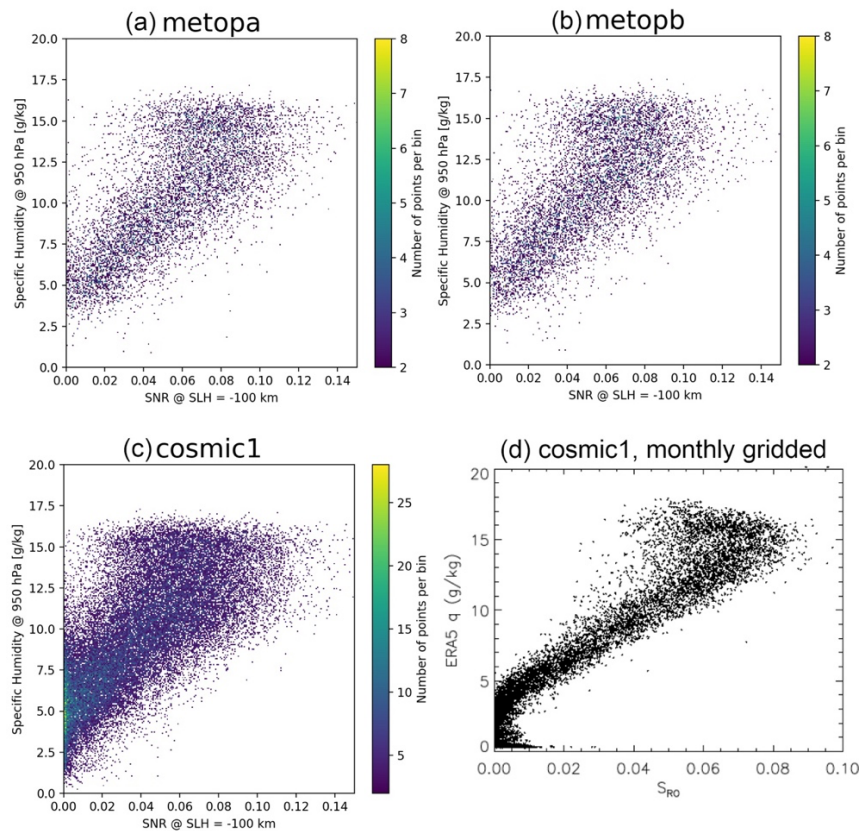

Fig. 3 in the revised manuscript: density plots of the specific humidity – SNR relationship constructed from the training dataset for (a) Metop-A; (b) Metop-B and (c) Cosmic-1. The ERA-5 950 hPa specific humidity between 45S and 45N and collocated and coincident SNR values at SLH = -100 km are used to construct these density plots. (d) is a reproduction of Fig. 9c in Wu et al. (2022) to show the same correlation but from monthly gridded data using Cosmic-1. One can easily see the linear relationship that was observed and reported in the Level-3 product in Wu et al. (2022) holds at Level-2 profile-by-profile level, but with much larger noise (hence a ML model would handle it better than a traditional multi-variable regression model).

### General comments

This paper proposes a method to obtain vertical profiles of water vapor from GNSS radio occultation (RO) observation in the marine planetary boundary layer (MPBL) using machine learning (ML), which is a form of artificial intelligence (AI). I know little about ML and AI (the paper should be reviewed by an expert in this area), so I reviewed the rest of the paper. The basic idea may be useful in a practical sense, but in my opinion it

is not acceptable for publication because it is difficult to understand and is unclear and imprecise in many places. Thus, it does not make a convincing case of the merit of using ML/AI to improve RO retrievals of water vapor in the MPBL. I recommend major revisions with care taken to use clear, precise, and understandable language.

We highly appreciate your comments with concerns about whether we are leaping forward too quickly without understanding the true physical mechanism clearly. In fact, the possible physical mechanisms for SNR to contain MPBL water vapor information have been discussed in detail in Wu et al. (2022). Now in the revised manuscript, we add Section 2.3 to summarize them, which includes normal bending (i.e., the situation when L2 retrieval algorithm can converge), grazing reflection (multi-path reflection), super-reflection, ducting or diffraction. SNR signal can be used for retrievals under all these 5 scenarios while the operational WetPrf/WetPf2 retrieval algorithm in the majority cases works only under the first scenario (i.e., normal bending). In reality, complex MABL can produce a mixed effect in the soundings from a combination of these scenarios. As a result, sophisticated physical radiation transfer models (e.g., radiohologram, canonical transform) can surely be used but at the expense of high computational costs and hence impractical operationally. Moreover, the retrieval itself is essentially still an under-constraint problem, which commonly occur for satellite retrievals and assumptions (no matter physically making sense or not) need to be made to fully constrain the physical model. As the quasi-linear relationship is preserved at profile-by-profile level with larger noise compared to the monthly gridded and smoothed data (new Fig. 3), and the height-dependency of the regression coefficient is highly non-linear (Fig. 2), a ML model is simply the best choice to extract the signal.

We'd like to reiterate that the scopes of this work are (1) to provide a practical way to extract MABL water vapor information from the SNR signal (2) demonstrate the feasibility of this method and the science value of it (now Lines 80-82 in the revised manuscript). We thank you very much for helping us rethink the scopes and values of this work and hopefully the revision makes them clear to the readers now.

A clear description of the scientific basis for the method, under what atmospheric conditions it is valid and useful, its limitations, and how it compares with 1D-Var retrievals of water vapor profiles in the MPBL would be useful. This is especially important for this paper, since it presents results from a technique that is unfamiliar to most experts in radio occultation. There are some odd words and phrases that should be replaced with more scientific or precise words. Please see some examples in the detailed comments section; these are only examples; I stopped looking carefully for language issues after a while.

Thanks very much for pointing out the language discrepancies and gave some valuable detailed suggestions below! We've gone through polishing the language much more carefully this round and hopefully clears up jargons/grammar errors that would negatively impact the reading experience.

A recent paper that is relevant to the discussion regarding SNR and the  $H_{SL}$  is Sokolovskiy et al. (2024), and this paper should be referenced in the Introduction (somewhere after Line 65).

Thanks for recommending reading this new publication! It is now cited in Section 2.3 when we recap the possible physical mechanisms to explain the information content in SNR.

The paper uses several different names for the ML method, most often "SNR-method" which is misleading. I suggest using the more descriptive name "ML-SNR method" (as done in Line 16) consistently throughout the paper. Whatever acronym is used, it should be consistent everywhere.

Thanks for this nice suggestion! Now we've changed "SNR-method" to "SNR-ML method" consistently throughout the text.

The authors use marine planetary boundary layer (MPBL), which is OK. But they may wish to consider using marine atmospheric boundary layer (MABL) instead to be consistent with what they used before in the closely related paper Wu et al. (2022).

Thanks for pointing this out! We have now changed all MPBL to MABL to keep consistency. When talking about the general PBL, we still keep this terminology considering its wide usage.

The numbering of Section 2 is currently:

2. Data and Model

2.1 Training and Validation Datasets

2.1.1 Machine Learning Model Selection

The number of Section 2.1.1 should be changed to 2.2.

Thanks for catching this mistake!

It would be useful to have a short simple summary of the steps used to train the model and then to validate it, perhaps including a numbered series of steps in the process or a flow chart. This could go at the end of Section 2. The highly technical first paragraph of Section 2.1.1 is not very useful to the nonexpert in ML. A new subsection to Section 2 could be added which included the series of steps or a flow chart showing the steps in the process: 2.3 Summary of ML-SNR model and validation

Thanks for the suggestion. We have added a Fig. 5 and rewritten the text of the 1<sup>st</sup> paragraph of Section 2.2 to give a summary of model architecture and input/output parameters, and the rest technical jargons have been removed. We also include the training codes together with the training and validation dataset. Hopefully the rearrangement of the three subsections under Section 2 logically make more sense to the readers now.

The authors use ERA5 MPBL water vapor data to train the ML-SNR model and then test the model using independent datasets. Although ERA5 is a well-tested and widely used reanalysis, there are likely significant uncertainties in the MPBL water vapor analysis, so it is only an approximation to "Truth." A ML model trained on ERA5 data that is tested with an independent data set will return retrievals that are consistent with ERA5. This seems to be the case in Fig. 4, although there is a lot of scatter. The comparisons of the ML-method retrievals of water vapor to radiosondes as done in the paper will contain the influence of ERA5 data. It would be useful to discuss the influence of the training data set on the retrievals. It would also be interesting to discuss how the retrieval of individual water vapor profiles would be used if the scatter (or uncertainty) of each profile is as large as the scatter in Fig. 4 suggests.

We totally agree with you that ERA-5 is not an "ideal truth" dataset to train upon. If we could have enough collocated shipborne radiosonde profiles or other dense ground-based measurements over the global ocean, we'd be more than happy to train against those. However, they do not exist, and ERA-5 is the "best available" to us. This has been discussed in the 3<sup>rd</sup> paragraph in Section 2.1. Nevertheless, the lower end of Fig. 4 (now Fig. 6 in the revised version) disagrees with ERA-5 significantly, indicating some real information is gained from the SNR signal when ERA-5 is essentially a flat value. Some sentences are added to Section 3.2 "uncertainty quantification" now to emphasize this point.

We also agree with you that some of the radiosonde data have been assimilated to the ERA-5 data. Based on the incomplete knowledge we learnt from the campaign coordinators or data distributors, for the campaigns that NOAA partially or fully funded (e.g., ARRecon, EUREC4A, ATOMIC), the radiosonde data have probably been assimilated or will be assimilated in the near future (so not in the current ERA-5 version

that we use here). There is no clear documentation to trace which are assimilated or not. For the rest campaigns that are sponsored by NSF, DOE or other agencies, the answer is probably no. Therefore they can be considered completely independent validation datasets. It is worth noting that there are several publications that use ARRecon or EUREC4A radiosondes as “independent dataset” to evaluate ERA-5 water vapor biases (e.g., Cobb et al., 2021; Kruger et al., 2022).

Cobb, A., A. Michaelis, S. Iacobellis, F. M. Ralph, and L. Delle Monache (2021): Atmospheric River Sectors: definition and characteristics observed using dropsondes from 2014-20 CalWater and AR Recon, *Mon. Wea. Rev.*, doi:10.1175/MWR-D-20-0177.1

Krüger, K., Schäfler, A., Wirth, M., Weissmann, M., and Craig, G. C.: Vertical structure of the lower-stratospheric moist bias in the ERA5 reanalysis and its connection to mixing processes, *Atmos. Chem. Phys.*, 22, 15559–15577, <https://doi.org/10.5194/acp-22-15559-2022>, 2022.

One of the intriguing findings is that this SNR retrieval product frequently outperforms the operational L2 wetPf2 product when evaluating against the shipborne campaign radiosonde profiles. Take the ARRecon as an example (Now Fig. 9, comparing the solid orange triangles from SNR method and open orange triangles from wetPf2). For the atmospheric river events, operational L2 retrieval seem to fail less in the PBL (only 20% less samples than using the SNR method) versus other regimes (>100% less collocated samples). However, one can see the SNR retrieval results are closer to the 1:1 line while wetPf2 tend to be dry biased in the atmospheric river events. Although operational wetPf2 product does not rely on ERA-5 reanalysis (albeit still use ECMWF IFS as the initial conditions in some 1DVar algorithms), however, since the temperature and water vapor contribution cannot be independently separated in the refractivity profile, wetPf2 retrievals do not necessarily produce better agreements with ground “truth”.

As for your last point, in practice we suggest users to not use retrieval with estimated uncertainty larger than 50% (Section 3.2). In addition, users need to be cautious to use retrieval in the deep tropics because the underlying physical explanation is frequently violated. These suggestions are included in the abstract and the conclusion. It is impossible to quantify how much added value or independent information come from SNR vs. from the training dataset from ERA-5. Nevertheless, the across-board better performance of SNR method versus wetPf2 shown in Fig. 11 statistical correlation suggests we gain scientifically valuable information from real deep-SNR measurements that the training dataset does not contain.

We have included some of the response above in the last paragraph of Section 3.3.

“To summarize the major findings for comparisons against the limited independent comparison against radiosonde/dropsonde datasets available over the open ocean, we can draw the following conclusions. Firstly, SNR-ML retrieval are the best at capturing the MABL vertical structure from the surface (975 hPa) up to 850 hPa globally compared to the ERA-5 reanalysis except at the deep tropics. The reason for the poor performance of the SNR-ML method in the deep tropics is probably due to the breakdown of the original assumption: turbulence and mixing in the tropical MABL by frequent shallow convections constantly disrupt the ducting condition, causing SNR reemerging at the deep HSL blending other information and hence are not useful for MABL water vapor retrieval. Secondly, compared to the operational Level-2 retrievals, the SNR-ML method can achieve 20 – 80% more samples in the MABL, especially over high-latitudes or in the deep tropics. Although some of the "independent validation dataset" is not completely independent as they may have been assimilated in the ERA5, the fact that SNR-ML retrieval statistics outperform ER-5 at all 6 pressure levels in diverse weather regimes prove that real physical information from SNR observations is learnt and kept by the ML model for prediction, admittedly it is impossible to quantify how much the real observed information contributes without accurate physics-based modeling simulations.”

The physical basis for the correlation of SNR as a function of the HSL with MPBL water vapor content, which was found by a related paper Wu et al. 2022 (I did not review this paper), is not explained well. The availability of meaningful SNR (SNR above the noise level) at all HSL levels depends on the boundary layer structure. For moist boundary layers that have no sharp inversions, this correlation is understandable; usable SNR are available all HSL levels in their model. However, for dry boundary layers there may be no useful SNR at deep levels, and for moist boundary layers with sharp inversions, there may be HSL levels with no useful values of SNR. The difference between dry and moist boundary layers and moist boundary layers with and without sharp inversions, and the effect of ducting and superrefraction should be discussed. All boundary layer structures are lumped together in this paper. Related to this issue is the confusing sentence beginning in Line 68 “The paper attributed such a positive correlation to the strong refraction from a horizontally stratiform and dynamically quiet MPBL water vapor layer that acts to enhance the SNR amplitude at deep  $H_{SL}$  through ducting and diffraction interference.” A similar issue exists with the sentence in Lines 244-247, which I do not understand.

We’ve now added Section 2.3 to discuss the several physical conditions that allow deepSNR to carry real physical information. All those conditions require certain level of “flat surfaces” for the radio waves, which include both a sharp and smooth PBL top and smooth surface. When convection happens, both PBL top and surface (due to strong wind) are not smooth anymore.

The paper refers to the 1D-Var retrieval of water vapor as “the standard Level-2 product” (line 12) which is imprecise and will mean nothing to most readers. Apparently it refers to the retrieval of water vapor and temperature from 1D-variational analysis (wetPrf in their paper). Please use a clear and precise term for this product and define it.

I see what you mean. Instead of explaining the details how L2 algorithm works, we now modify the 4<sup>th</sup> paragraph in Section 1 when Level-2 product is first introduced. It now reads as “GNSS Radio Occultation (GNSS-RO) retrieves temperature and water vapor profiles using the 1D-Var approach routinely from the Level 2 bending angle product (referred as "standard L2 product" or "operational L2 product" hereafter), the latter of which is used operationally in numerical weather data assimilation systems to improve weather forecasts (e.g.,Kuo et al. (2000)).”.

Johnston et al. (2021) use the newer wetPf2 water vapor data (Wee et al. 2022.) The Gong et al. paper refers to wetPrf and uses it in the comparison with the ML-SNR retrievals. WetPrf is the older and less accurate retrieval.

Sorry that I'm not fully aware the difference between wetPrf and wetPf2. We read this Wee et al. (2022) paper and double checked the UCAR website. The WetPf2 retrievals are used after 2016 for COSMIC-1 and COSMIC-2 satellite missions, while the 2012 and 2013 comparison still used WetPrf data because WetPf2 is not available for download. For Metop-A and Metop-B, we couldn't find wetPf2 product on the UCAR website, and hence we downloaded the wetPrf retrievals for UMD web site. We have clarified and cited this paper when operational product is introduced in Section 2.1 when introducing the training and validation datasets. To keep consistency, we updated Fig. 1 COSMIC-1 curve with WetPf2 now. The new added paragraph in Section 2.1 reads as:

“GNSS-RO operational water vapor retrieval product provided by the University Corporation for Atmospheric Research (UCAR) is employed to evaluate the quality of the SNR-ML retrievals. This operational product is called "wetPrf" for data collected before 2013, and "wetPf2" afterwards. The latter has better penetration depth (Wee et al. (2022)) and is used for constructing Fig. 1, but "wetPrf" product is used for the MAGIC campaign comparison because it was carried out during 2012 - 2013. Note that the key Level-2 profile to enable the 1D-VAR retrieval used by the wetPrf/wetPf2 product is the bending angle, which is assimilated in the ERA-5 reanalysis. Therefore, this is not an independent evaluation dataset. The purpose of this comparison is to identify the merits and caveats of the SNR-ML retrievals against an existing mature product.”



Why are the differences in the penetration rates in atmPrf and wetPrf different in COSMIC-1 (blue) and COSMIC-2 (red)? In COSMIC-1 the wetPrf retrieval rate at low levels is greater than the atmPrf retrieval rate (e.g. at 4 km, ~28% for wetPrf and less than 2% for AtmPrf). In COSMIC-2, the opposite is shown; the penetration rate for atmPrf is greater than that for wetPrf in the low levels. Why do the authors use the number of Level-1B files as the denominator; it would be better to use the total number of each files (profiles) in the denominator (success rate = number of retrieved values/number of profiles).

After some inspection, we found that we used wetPrf for COSMIC-1 (version 2013.3520) and wetPf2 for COSMIC-2. That is probably the reason why the success rate is different for atmPrf and wetPrf. The figures now have been replaced with and atmPrf and wetPf2 for COSMIC-1 from an up-to-date version (2021.0390). The descriptions of success rate in the main text are updated accordingly. There is only very minor difference between wetPrf and wetPf2 for the COSMIC-1 success rate (30% ->40% at 0.5 km, 60% -> 55% at 1 km), but atmPrf seems to be more sensitive to version changes. This could be due to advances in excess phase computations, retrieval software, GNSS orbits, clock, and earth orientation products (UCAR Data Release, 2022).

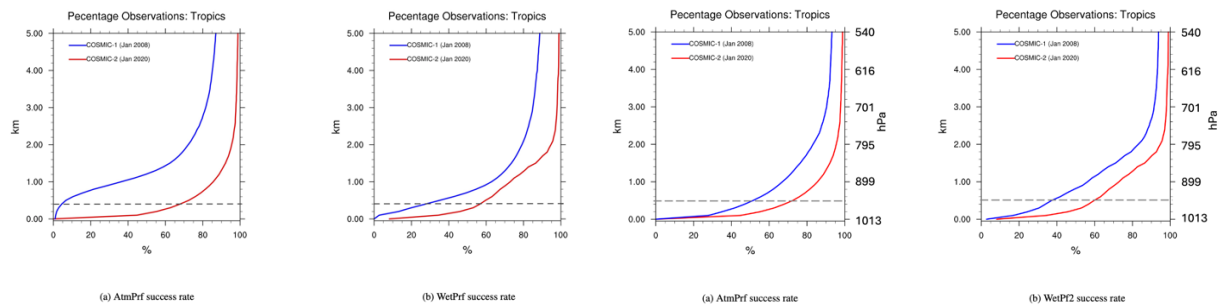

Old Fig. 1 (left two panels) vs. new Fig. 1 (right two panels; updated with 2021.0390 version).

How are the uncertainty values in Section 3.2 and Fig. 6 defined and determined?

Please refer to the new Fig. 5 for the ML model internal architecture. In each layer, we randomly drop 25% of the neurons during training. Since it's random dropping, the neuron nodes could be critical parameters or only remotely related. Through the 100 epochs of training, the dropping process can partially capture the stochastic nature of the relationship between inputs and outputs. Then when we run prediction for the independent validation dataset, we run 30 predictions for each input sets. The standard deviation of the 30 predictions is used as the prediction uncertainty. This is a widely acknowledge method in the ML community to estimate model uncertainty (Gal and Ghahramani, 2014). Although we found that in real world retrievals, this method

tends to under-estimate the real uncertainty, it is well correlated with the uncertainty generated from physical algorithms (in a completely different retrieval project, so the conclusion might not be generalizable, but we are working on a paper to report this).

Yarin Gal and Zoubin Ghahramani: Dropout as a Bayesian Approximation: Representing Model Uncertainty in Deep Learning, Proceedings of the 33 rd International Conference on Machine Learning, <https://proceedings.mlr.press/v48/gal16.pdf>

The References are not in alphabetical order.

Thanks! We have corrected this.

Lines 55-56-In addition to decreasing SNR, which limits the vertical penetration of the RO profiles, superrefraction in the PBL is an issue. Superrefraction makes it impossible to obtain a unique bending angle profile.

In Wu et al. (2022) paper, super-refraction is mentioned as one of the possible mechanisms to cause L2 retrieval failure and let reemerged SNR carry MABL information. Now this mechanism is further elaborated in the new Section 2.3 which lays out several possible physical mechanisms.

Figure 2 needs to be improved. The numbers on the x- and y-axis are not legible, and the axes are not labeled. It appears that there are two figures in 2a and 2b, grid indices at the top and correlations with ERA5 specific humidities in the lower right corner. But the lower right corner is solid dark green, indicating a perfect correlation of 1.0? The other "boxes" at the bottom of the figure to the left of the solid green box at the lower right corner oscillate between positive and negative correlations, and this should be discussed,

After secondary thoughts, we believe the cross-correlations among different excess phase levels are less important to show than to demonstrate that all levels are correlated with MABL specific humidity, which justifies the reason why we'd like to use the entire profile instead of just one level for the retrieval. However, we agree that this figure is too busy and hard for readers to capture the main idea. They are now cropped to only show the bottom row (see below). The other two figures in the appendix are also updated. Specific humidity values are highly correlated among different pressure levels but are not exactly 1:1 correlated. The previous cross-correlation figure is too crowded to differentiate the gradient.

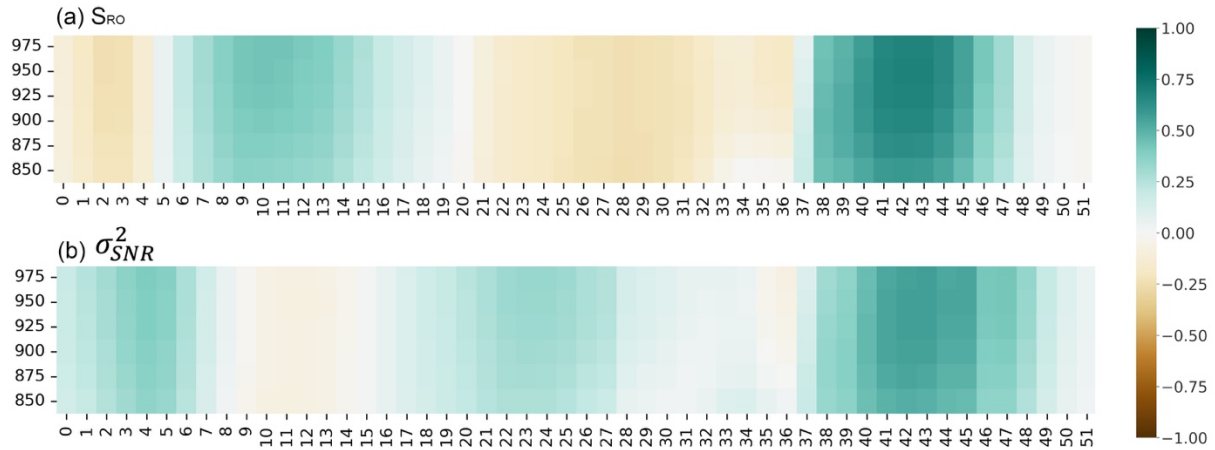

Figure 2. Correlation between collocated ERA5 specific humidity at 975 - 850 hPa and SRO (top) and  $\sigma^2_{SNR}$  (bottom) at various excessive phase levels from the training COSMIC1-ERA5 dataset). Only grid indices are shown in the axis titles, and the corresponding  $\text{Log}_{10}(\phi L1)$  values can be found in Table B1.

The caption refers to Table A2, which does not exist.

Thanks a lot for spotting A2. It's a wrong reference label when editing the Latex doc and has been fixed.

Fig. 3 has a lot of blank space and in the three regions of campaigns it difficult to see the details. Consider three separate maps of the three regions.

Thanks for the suggestion! Now three regional maps are included in the new Fig. 4.

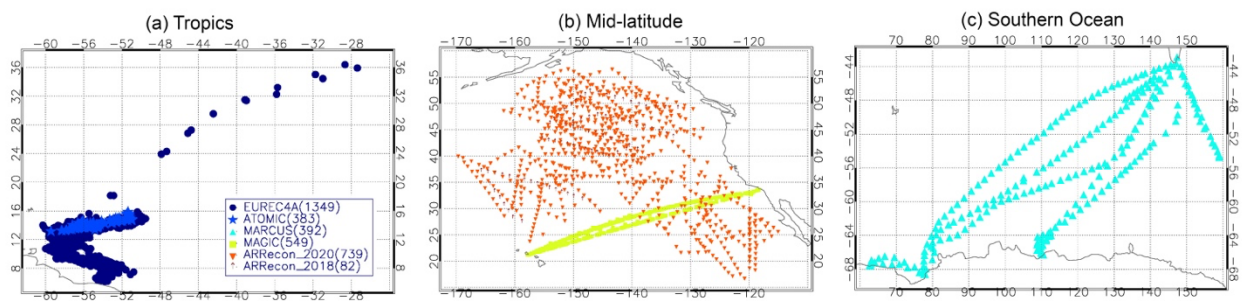

Figure 4. Maps for radiosonde/dropsonde locations from different shipborne or airborne campaigns in (a) tropics; (b) mid-latitudes; (c) southern ocean. Detailed campaign information can be found in Table 2.

Figure 7 also needs a better explanation. The gray dashed line (ERA5) is difficult to see. How are the solid black lines and the dashed black lines constructed? They are irregular

so they don't look like best fit lines. I presume the solid thin straight black line is the 1:1 line, but why does it not extend to the corners of the grid? SNR retrieval should be ML-SNR retrieval in the caption. "Level-2 retrievals" in the caption should be "wetPrf" retrievals. There are very faint orthogonal red and black lines in the figure—what are these? This figure contains a lot of information and detail; consider breaking into two figures and/or making them larger. Presenting results at 4 pressure levels rather than 6 might help. This is an important figure and should be clear and explained well.

Thanks for your detailed suggestion! We have now updated Fig. 7 (now Fig. 9) with adding in the new Metop-A and Metop-B collocations, and rewritten the figure caption to clarify some misunderstandings. We cannot make these panels less busy because the amount of information to deliver is indeed a lot. The ERA-5 line is replaced from grey to brown now in color. Fig. 9 and Fig. 10 are both huge in image size (3162 X 2475 pixels with 330 dpi), so readers interested in scrutinizing details can enlarge the image up to 200% of the original size and still see everything clearly.

To clarify the meaning of the lines along the diagonal direction: the thin straight lines are the 1:1 line for reference. Black bold solid lines are made by connecting the mean values of each campaign (now changed to big grey symbols with errorbar), so do the black dashed lines (L2 operational product) and grey dash-dot lines (ERA5 subsamples). Now the caption for Fig. 9 reads as:

Figure 9. Scatter plots of collocated specific humidity comparison between radiosonde "truth" and retrievals from SNR (closed symbols) and Level-2 standard retrieval (open symbols) for each pressure level. Black thin diagonal lines are the 1:1 lines for reference. The mean and standard deviation from the SNR-ML retrieval from each campaign are shown as bigger symbols with the same color. In addition, the mean retrieved values from each campaign as opposed to the mean from radiosonde "truth" are shown as the bold black lines for SNR-ML retrievals, bold black dash-dotted lines for wetPf2 retrievals, and grey dashed lines for ERA-5 from the subset where collocations are found for SNR-ML and radiosonde data samples.

I did not review Section 4 carefully.

Detailed comments

1. Lines 1 and 3, also Line 299—what kind of gradient? Horizontal gradient or vertical gradient?

Vertical gradients. Words added now.

2. Line 5 Define SNR as signal to noise ratio—it is not an acronym for deep refraction signals.

Now changed from “signal” to “signal-to-noise ratio (SNR) signal”.

3. Line 7—what is “pixel-level water vapor profiling?” What pixels?

Now changed to “profile-by-profile water vapor retrieval”.

4. Lines 30-31: What is “polar proneness to the climate change”?

What I mean is polar region is more prone to climate change than other places because of the positive reinforcement of temperature-ice melting feedback. The wording is now changed to “proneness of polar area to the climate change”.

5. Line 38: grammatically incorrect; I suggest rewriting “Emissions from clouds often overwhelm the emission signal...”

Thanks! Grammar error corrected.

6. Line 39: Delete “in the scene”

Thanks! Deleted.

7. Line 44: delete “which couldn’t be used to gain....MPBL.”

Now changed to “which still lacks the vertical information of WV in the MABL”.

8. Line 46-use “high resolution” rather than “superb resolution” and give the nominal vertical resolution (100-200 m).

Thanks. Changed.

9. Line 52: “coarse horizontal resolution” should be replace by “relatively large horizontal footprint.” Resolution refers to the average distance between observation points, footprint refers to the spatial scale of the atmosphere that affects the observation (see Boukabara et al. 2021).

Well I would disagree with this statement. For nadir-looking, cross-track scan or conical scan instruments, footprint is defined as the half power beam width (HPBW), which is determined by the satellite antenna size and distance from Earth’s surface. For limb sensors like GPS, the horizontal resolution is determined

by the weighting function width and viewing geometry. "Footprint" is not a standard terminology to use for limb sensors.

10. Line 53-typo-concern.

Thanks! Corrected to "concern".

11. Line 53- What does the sentence "This is typically not a big concern in MPBL as vertical gradient is much sharper and harder to characterize if not using in-situ measurements (e.g. shipborne radiosonde)" mean?

Now changed to "This is typically not a big concern in MABL as vertical gradient is much sharper than horizontal gradient and harder to characterize ~~if not using in-situ measurements (e.g., shipborne radiosonde).~~" What we mean is MABL vertical gradient is sharper than horizontal gradient usually, so coarse horizontal resolution using GNSS-RO is not a big concern considering its relatively good vertical resolution.

12. Line 56—SNR decreases with decreasing height. Current sentence "decreases with height" implies that it decreases upward.

You are absolutely correct. The sentence now has been rewritten as "decreases with decreasing altitude".

13. Lines 57-59—This is misleading. It says the water vapor retrievals fail to converge because they require a high SNR, when in fact the main issue is that the RO signals do not penetrate deeply enough because of decreasing SNR near the surface.

Yes, we agree with you. Now the sentence is modified as "~~the Level-2 radio-occultation (RO) signal hence often does not meet the SNR threshold near the surface. refractivity retrievals which require a high SNR drops subsequently in the MABL as the signal becomes noisy. As a result, the GNSS-RO water vapor~~

~~retrievals that rely on the refractivity profiles often fail to converge~~ **the GNSS-RO 1D-Var based retrievals fail in the MABL due to weak RO signal."**

14. Line 61—Fig. 1 does not show that C2 has improved its SNR—it shows that C2 has a deeper penetration rate than C1, which is a result of higher SNR. This is another example of an imprecise/incorrect statement.

Please see response above.

15. Line 64 and 119-The Maneshan et al. (2024) reference is not in the References section.

This paper was just submitted to AMT when the current manuscript was submitted the same time. Now Maneshan et al. (2024) is published on AMTD. We have updated the citation.

16. In Fig. 1, it should be stated that the height is mean-sea level rather than impact height, which is often used, and the y-axis should be labeled MSL (km).

Caption of Fig. 1 is changed to clarify it's "height above sea-level". The wetPrf data has been replaced with wetPf2 for both COSMIC-1 and COSMIC-2 for consistency, and the pressure level is added to the right axis.

17. Line 72-delete "understandably"

Done

18. Lines 79-80: These two sentences could be replaced by something like "Artificial Intelligence/Machine Learning (AI/ML) has been increasingly used in remote sensing in recent years."

Done.

19. Line 95—delete "thoroughly"

Done.

20. Line 110-define  $f_{L1}$

$\Phi_{L1}$  is L1 excess phase.

21. Line 112: How can you say ERA-5 is the best reanalysis? I agree that it is very good, but the best? Do you mean ERA5 is better than MERRA-2 in the metric you talk about in the next few sentences?

Yes. In terms of PBL specific humidity bias, ERA-5 is less biased than MERRA-2 in all latitudes according to Johnston et al. (2021). For many other variables related to cloud and precipitation, that's the same case but since it's irrelevant, the meaning of this statement should be confined and not be extrapolated. I think the first sentence in this paragraph is clear about the condition for this statement. Do you feel it's not strong and clear enough?

Lines 113-114—Johnston et al. (2021) used the improved wetPf2, not wetPrf.

Corrected.

22. Line 144---Reference for CNN model?

Citation LeCun et al. (2015) is now added.

23. Line 144 and 157—replace “old-fashioned” with something like “earlier” or “simpler”.

Changed to “earlier”. CNN is revolutionary but not necessarily better than some simple ML models in all use cases. Our project is a rather simple case for ML, so performance is quite comparable with using those “earlier” ML models.

24. Lines 202, 235 and other places—Use “wetPrf” retrievals instead of “Level-2 retrievals.”

Done. “Level-2” had been either deleted or replaced with “wetPrf/wetPf2” or “operational”.

25. Line 258---Rewrite to say “...the general patterns in the ML-SNR method and MERRA-2 specific humidities agree fairly well.”

Reword to “The geographic distribution of highs and lows and their gradients are in general agreeable.”

26. Line 263---I would not describe the comparisons shown in Fig. 11 as “more boring.” I am not sure what is meant by this characterization. Perhaps it means that the structures are less complicated than in Fig. 10, or that the agreement is better? In any case, that is not necessarily “more boring.”

Relaced “more boring” with “lacking geographical variations”.

27. Line 270—delete “notorious.”

Done.

28. 12 is not mentioned in the text of section 4.2. It should be introduced in the text somewhere around Line 275.

Oh thanks for spotting this stupid overlook!



29. Line 287—replace “drops down” with “decreases.”

Done.

30. Line 293—delete “from this exercise.”

Done.

31. Line 296—replace “will keep this topic foggy” by something like “make observing and verifying the true diurnal cycle difficult.”

Done.

32. Line 297—delete “disentangle this mystery”

Deleted.

## References

Boukabara, S.-A., J. Eyre, R.A. Anthes, K. Holmlund, K. St. Germain, and R.N. Hoffman, 2021: The Earth-Observing Satellite Constellation: A review from a meteorological perspective of a complex, interconnected global system with extensive applications, *IEEE Geoscience and Remote Sensing Magazine*, **9**, 3, 26-42. <https://doi.org/10.1109/MGRS.2021.3070248>

Sokolovskiy, S., Z. Zeng, D. Hunt, J.-P. Weiss, J. Braun, W. Schreiner, R. Anthes, Y.-H. Kuo, H. Zhang, D. Lenschow, and T. VanHove, 2024: Detection of super-refraction at the top of the atmospheric boundary layer from COSMIC-2 radio occultations. *J. Atmos. and Ocean Tech.*, **40**, 65-78. <https://doi.org/10.1175/JTECH-D-22-0100.1>

Wee, T.-K.; R.A. Anthes, D.C. Hunt, W.S. Schreiner, and Y.-H. Kuo, 2022: Atmospheric GNSS RO 1D-Var in Use at UCAR: Description and Validation. *Remote Sens.*, **14**, 5614. <https://doi.org/10.3390/rs14215614>

Thanks much for sharing these recent relevant publications which we overlooked. They have now been included in the reference list and in appropriate locations in the main text as citations.
